# Supplementary material for: Theoretical investigation on the structural and thermodynamic properties of FeSe at high pressure and high temperature
Source: Royal Society of Chemistry journal article supplement (doi:10.1039/c2dt30254c), 2012-01-01
Supplement: c2dt30254c.pdf [file c2dt30254c.pdf]

## Electronic Supplementary Information:

### The expressions for thermodynamic properties of FeSe at high pressure and high temperature

The thermal equation of state  $V(P,T)$  can be obtained by solving the non-equilibrium Gibbs function with respect to volume  $V$

$$\left( \frac{\partial G^*(V;P,T)}{\partial V} \right)_{P,T} = 0 \quad (\text{A1})$$

From equation A1, one can get the thermal equation of state. Then, the isothermal bulk modulus  $B_T$ , the vibrational internal energy  $U_{\text{vib}}$ , the heat capacity of constant volume  $C_V$ , the heat capacity at constant pressure  $C_P$ , the vibrational entropy  $S_{\text{vib}}$  and the thermal expansion coefficient  $\alpha$  can be derived as

$$B_T(P,T) = V \left( \frac{\partial^2 G^*(V;P,T)}{\partial V^2} \right)_{P,T} = 0, \quad (\text{A2})$$

$$U_{\text{vib}} = nk \left[ \frac{9}{8} \frac{\Theta}{T} + 3D(3\Theta/T) \right], \quad (\text{A3})$$

$$C_V = 3nk \left[ 4D\left(\frac{\Theta}{T}\right) - \frac{3\Theta/T}{e^{\Theta/T} - 1} \right], \quad (\text{A4})$$

$$C_P = C_V(1 + \alpha\gamma T), \quad (\text{A5})$$

$$S_{\text{vib}} = nk \left[ 4D(3\Theta/T) - 3\ln(1 - e^{-\Theta/T}) \right], \quad (\text{A6})$$

$$\alpha = \frac{\gamma C_V}{B_T V}, \quad (\text{A7})$$

where the Grüneisen parameter  $\gamma$  is defined as

$$\gamma = - \frac{d \ln \Theta(V)}{\ln V} \quad (\text{A8})$$
